# Supplementary material
Source: PubMed Central journal article supplement (PMC3778045)

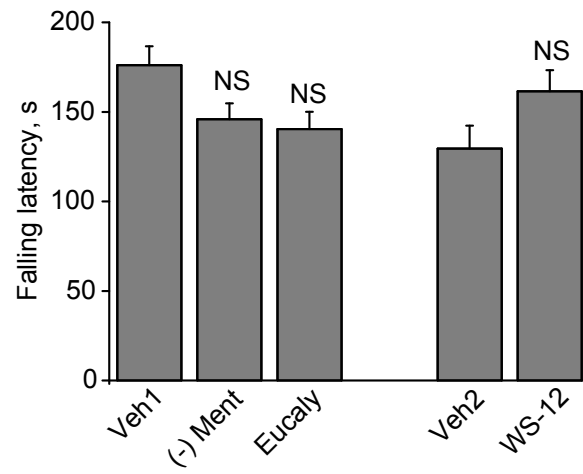

Supplement: NIHMS501858-supplement-01.pdf [file NIHMS501858-supplement-01.pdf]

**A**

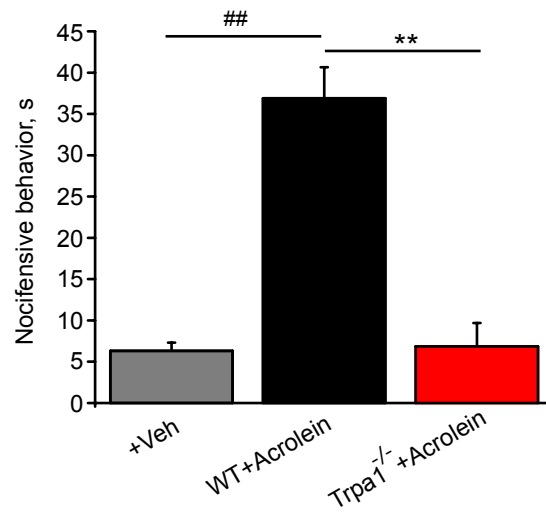

**B**

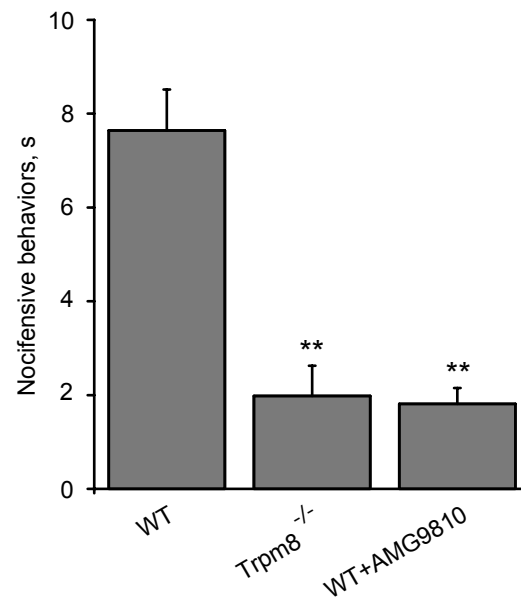

Supplement: NIHMS501858-supplement-02.pdf [file NIHMS501858-supplement-02.pdf]

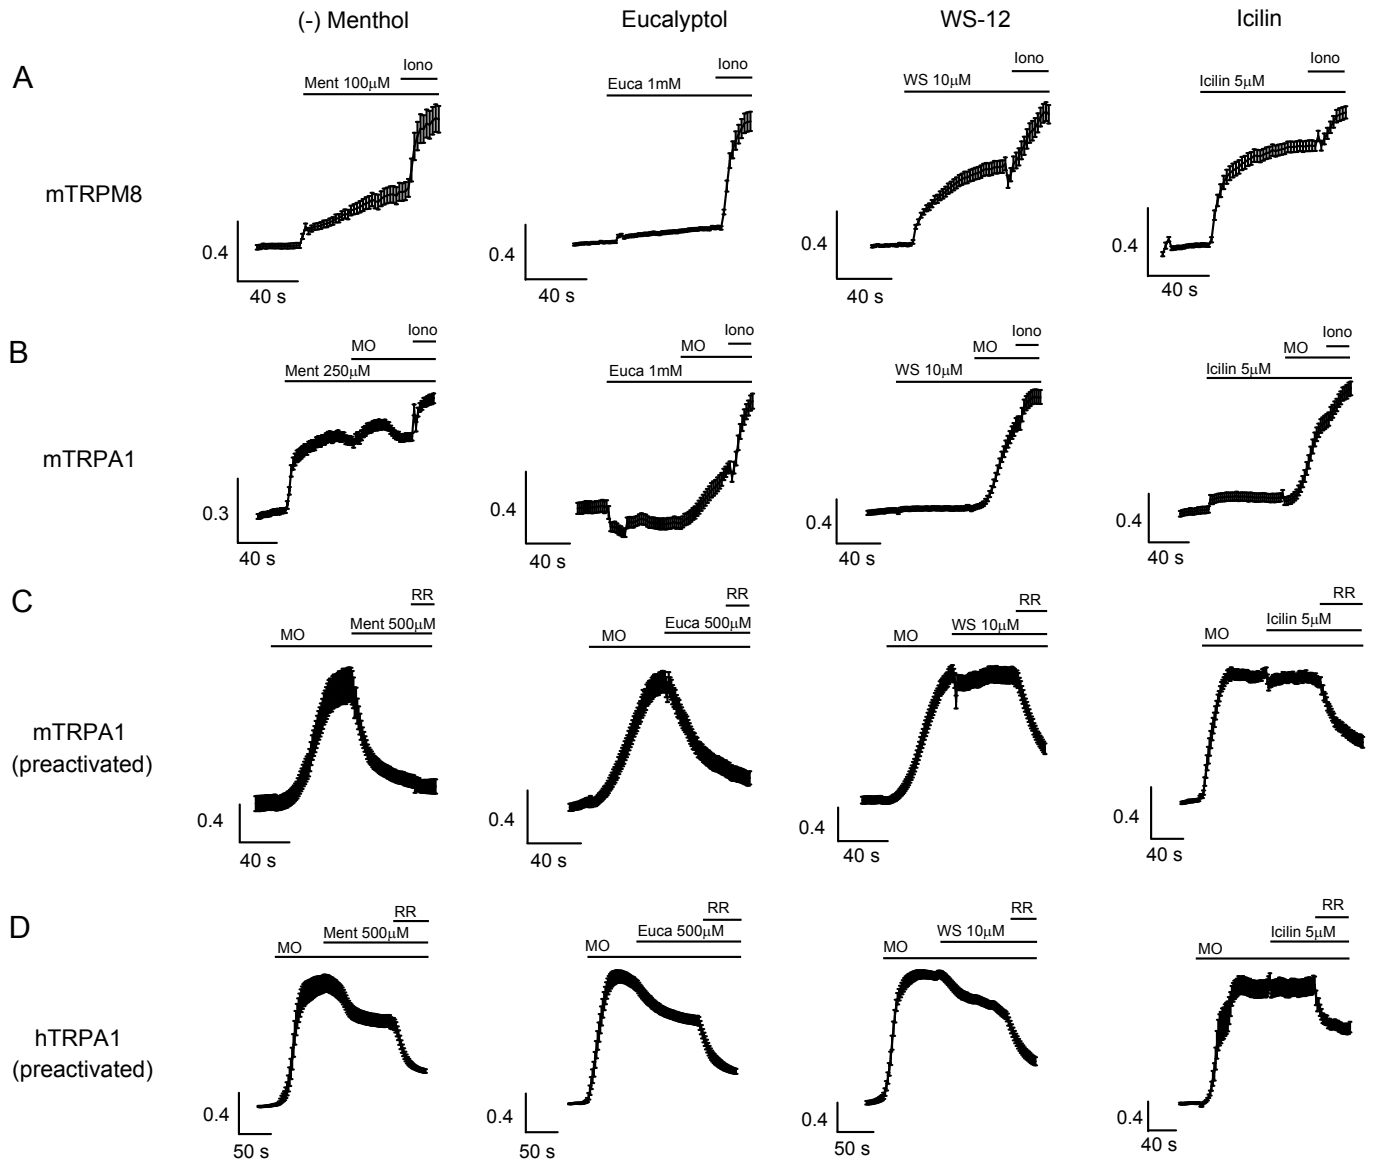

Supplement: NIHMS501858-supplement-03.pdf [file NIHMS501858-supplement-03.pdf]
